# Supplementary material
Source: PubMed Central journal article supplement (PMC1176449)

**A**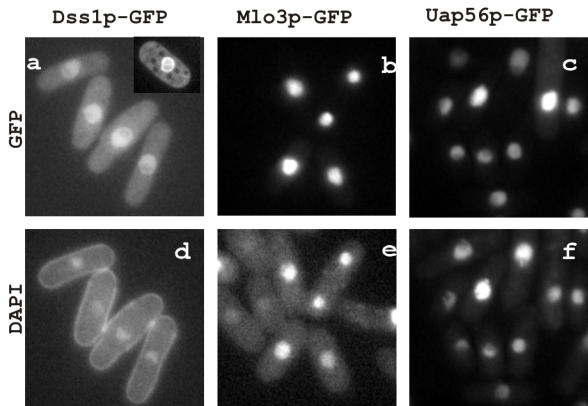**B**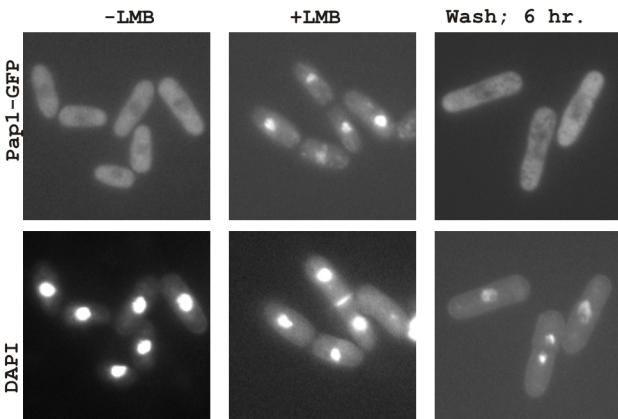

Supplement: 7600713s2.pdf [file 7600713s2.pdf]
